# Supplementary material
Source: PubMed Central journal article supplement (PMC5885177)
Supplement: jamaoncol-4-791-s001.pdf [file jamaoncol-4-791-s001.pdf]

## Supplementary Online Content

Nipp RD, Shui AM, Perez GK, Kirchoff AC, et al. Patterns in health care access and affordability among cancer survivors from during implementation of the affordable care act. *JAMA Oncol.* doi:10.1001/jamaoncol.2018.0097

**eTable 1.** Participant Characteristics

**eTable 2.** Health Care Accessibility Issues in the Previous 12 Months for Cancer Survivors and Control Respondents

**eTable 3.** Health Care Affordability Issues in the Previous 12 Months for Cancer Survivors and Control Respondents

**eTable 4.** Ability to Afford All Six Health Care Services in the Previous 12 Months for Cancer Survivors and Control Respondents

**eTable 5.** Questions Related to Healthcare Access and Affordability from the National Health Interview Survey (NHIS)

This supplementary material has been provided by the authors to give readers additional information about their work.

**Supplemental Table 1. Participant Characteristics**

| Characteristic                      | Cancer Survivors* | Control Respondents* | P*      |
|-------------------------------------|-------------------|----------------------|---------|
|                                     | N=15,182          | N=15,182             |         |
|                                     | %                 | %                    |         |
| <b>Age in years</b>                 |                   |                      |         |
| 18 to <40                           | 7.0%              | 7.3%                 | [ref]   |
| 40 to <50                           | 9.6%              | 10.1%                | 0.96    |
| 50 to <65                           | 32.0%             | 32.9%                | 0.86    |
| 65 to <80                           | 36.2%             | 35.4%                | 0.36    |
| 80+                                 | 15.2%             | 14.5%                | 0.24    |
| <b>Sex</b>                          |                   |                      | <0.0001 |
| Female                              | 59.8%             | 54.9%                |         |
| Male                                | 40.2%             | 45.1%                |         |
| <b>Race</b>                         |                   |                      |         |
| White                               | 86.5%             | 81.8%                | [ref]   |
| African-American                    | 8.7%              | 11.1%                | <0.0001 |
| Other                               | 4.8%              | 7.0%                 | <0.0001 |
| <b>Hispanic Ethnicity</b>           | 6.7%              | 10.8%                | <0.0001 |
| <b>Married</b>                      | 57.8%             | 57.7%                | 0.85    |
| <b>Year of NHIS Survey</b>          |                   |                      |         |
| 2010                                | 13.9%             | 14.1%                | [ref]   |
| 2011                                | 13.4%             | 15.0%                | 0.11    |
| 2012                                | 13.7%             | 15.1%                | 0.15    |
| 2013                                | 14.3%             | 14.3%                | 0.89    |
| 2014                                | 13.9%             | 13.3%                | 0.31    |
| 2015                                | 14.8%             | 12.7%                | 0.006   |
| 2016                                | 16.1%             | 15.5%                | 0.41    |
| <b>Region</b>                       |                   |                      |         |
| South                               | 36.8%             | 36.8%                | [ref]   |
| Northeast                           | 18.1%             | 18.4%                | 0.83    |
| Midwest                             | 24.4%             | 22.8%                | 0.30    |
| West                                | 20.7%             | 22.0%                | 0.30    |
| <b>Education</b>                    |                   |                      |         |
| Less than High School               | 13.6%             | 16.6%                | <0.0001 |
| Graduated High School/GED           | 28.5%             | 28.2%                | 0.31    |
| More than High School               | 57.9%             | 55.2%                | [ref]   |
| <b>Working for pay</b>              | 31.4%             | 38.3%                | <0.0001 |
| <b>Paid sick leave</b>              | 59.4%             | 57.1%                | 0.0024  |
| <b>Household Income</b>             |                   |                      |         |
| Under \$25,000/year                 | 36.4%             | 34.1%                | 0.58    |
| \$25,000 to \$54,999/year           | 32.3%             | 35.5%                | 0.04    |
| \$55,000/year and up                | 31.3%             | 30.4%                | [ref]   |
| <b>Insurance information</b>        |                   |                      |         |
| <b>Insured</b>                      | 94.8%             | 92.2%                | <0.0001 |
| <b>Among those with insurance:</b>  |                   |                      |         |
| Government-Sponsored Insurance      | 44.3%             | 38.8%                | <0.0001 |
| Private Health Insurance            | 57.5%             | 58.8%                | 0.14    |
| <b>Years since cancer diagnosis</b> |                   |                      |         |
| 0-1                                 | 14.2%             | N/A                  |         |

|                                |       |     |  |
|--------------------------------|-------|-----|--|
| 2-5                            | 26.3% | N/A |  |
| 6-10                           | 21.3% | N/A |  |
| 11-15                          | 14.4% | N/A |  |
| 16+                            | 23.8% | N/A |  |
| <b>Cancer Type<sup>1</sup></b> |       |     |  |
| Prostate                       | 39.1% | N/A |  |
| Breast                         | 23.8% | N/A |  |
| Cervical                       | 14.0% | N/A |  |
| Melanoma                       | 9.8%  | N/A |  |
| Uterine                        | 9.3%  | N/A |  |
| Colon                          | 8.0%  | N/A |  |
| Ovarian                        | 5.4%  | N/A |  |
| Lymphoma                       | 4.2%  | N/A |  |
| Lung                           | 3.9%  | N/A |  |
| Thyroid                        | 3.8%  | N/A |  |
| Kidney                         | 3.1%  | N/A |  |
| Testicular                     | 3.1%  | N/A |  |
| Leukemia                       | 1.7%  | N/A |  |
| Throat-pharynx                 | 1.2%  | N/A |  |
| Bone                           | 1.1%  | N/A |  |
| Liver                          | 1.1%  | N/A |  |
| Brain                          | 1.0%  | N/A |  |
| Other <sup>2</sup>             | 11.3% | N/A |  |

\* The total number of participants in the NHIS sample adult public use files from the 2010-2016 surveys is 232,650. After applying the study cohort inclusion/exclusion criteria, the sample size is 225,802, including 15,182 cancer survivors. After matching on age within one year, the total cohort sample size is 30,364 (15,182 cancer survivors, 15,182 control respondents).

\* P-values from unadjusted binary logistic regression models.

<sup>1</sup> Percentages may add up to over 100% because each cancer type is a separate yes/no question and respondents may have had more than one cancer.

<sup>2</sup> Includes cancers of the rectum, stomach, pancreas, soft tissue, blood, esophagus, mouth/tongue/lip, larynx-windpipe, and gallbladder. Does not include skin (non-melanoma) cancers.

**Supplemental Table 2: Health Care Accessibility Issues in the Previous 12 Months for Cancer Survivors and Control Respondents**

| Model Outcome Variable <sup>1</sup>            | Medical care delayed |                  |               | Needed but not get medical care |                  |                   |
|------------------------------------------------|----------------------|------------------|---------------|---------------------------------|------------------|-------------------|
|                                                | OR                   | 95% CI           | P             | OR                              | 95% CI           | P                 |
| <b>Cancer Survivors vs Control Respondents</b> | <b>1.38</b>          | <b>1.16-1.63</b> | <b>0.0003</b> | <b>1.76</b>                     | <b>1.45-2.12</b> | <b>&lt;0.0001</b> |
| <b>Age (years)</b>                             |                      |                  |               |                                 |                  |                   |
| 18 to <40                                      | -                    | -                | -             | -                               | -                | -                 |
| 40 to <50                                      | 1.27                 | 0.96-1.67        | 0.0961        | 1.25                            | 0.91-1.73        | 0.1768            |
| 50 to <65                                      | 1.01                 | 0.80-1.28        | 0.9302        | 0.90                            | 0.68-1.19        | 0.4580            |
| 65 to <80                                      | 0.27                 | 0.19-0.37        | <0.0001       | 0.20                            | 0.13-0.32        | <0.0001           |
| 80+                                            | 0.39                 | 0.12-1.23        | 0.1078        | 0.20                            | 0.04-1.03        | 0.0540            |
| <b>Female sex</b>                              | 1.24                 | 1.04-1.48        | 0.0188        | 1.26                            | 1.02-1.57        | 0.0314            |
| <b>Race</b>                                    |                      |                  |               |                                 |                  |                   |
| White                                          | -                    | -                | -             | -                               | -                | -                 |
| Black                                          | 0.92                 | 0.72-1.17        | 0.4856        | 1.19                            | 0.91-1.55        | 0.2089            |
| Other                                          | 0.78                 | 0.57-1.06        | 0.1153        | 0.85                            | 0.58-1.24        | 0.3882            |
| <b>Hispanic ethnicity</b>                      | 0.74                 | 0.55-0.99        | 0.0413        | 0.99                            | 0.71-1.37        | 0.9353            |
| <b>Not married</b>                             | 2.28                 | 1.92-2.72        | <0.0001       | 2.24                            | 1.83-2.75        | <0.0001           |
| <b>Year of NHIS Survey</b>                     |                      |                  |               |                                 |                  |                   |
| 2010                                           | -                    | -                | -             | -                               | -                | -                 |
| 2011                                           | 1.11                 | 0.83-1.48        | 0.4885        | 1.17                            | 0.82-1.66        | 0.3941            |
| 2012                                           | 1.00                 | 0.76-1.31        | 0.9830        | 1.00                            | 0.71-1.42        | 0.9826            |
| 2013                                           | 1.07                 | 0.80-1.437       | 0.6531        | 1.08                            | 0.73-1.58        | 0.7097            |
| 2014                                           | 0.93                 | 0.66-1.31        | 0.6834        | 1.13                            | 0.77-1.65        | 0.5470            |
| 2015                                           | 0.89                 | 0.65-1.21        | 0.4534        | 1.01                            | 0.72-1.42        | 0.9550            |
| 2016                                           | 0.99                 | 0.72-1.35        | 0.9247        | 1.03                            | 0.70-1.53        | 0.8709            |
| <b>Region</b>                                  |                      |                  |               |                                 |                  |                   |
| South                                          | -                    | -                | -             | -                               | -                | -                 |
| Northeast                                      | 0.84                 | 0.65-1.09        | 0.1990        | 0.84                            | 0.59-1.21        | 0.3467            |
| Midwest                                        | 1.08                 | 0.87-1.33        | 0.4985        | 1.04                            | 0.82-1.33        | 0.7335            |
| West                                           | 1.27                 | 1.00-1.60        | 0.0463        | 1.18                            | 0.91-1.54        | 0.2110            |
| <b>Education</b>                               |                      |                  |               |                                 |                  |                   |
| Less than High School                          | 0.90                 | 0.65-1.24        | 0.5197        | 0.87                            | 0.60-1.27        | 0.4756            |
| Graduated High School/GED                      | 0.71                 | 0.58-0.87        | 0.0010        | 0.78                            | 0.63-0.97        | 0.0249            |
| More than High School                          | -                    | -                | -             | -                               | -                | -                 |
| <b>Not working for pay</b>                     | 1.08                 | 0.87-1.34        | 0.4775        | 0.99                            | 0.78-1.25        | 0.9158            |
| <b>No paid sick leave</b>                      | 1.41                 | 1.15-1.72        | 0.0011        | 1.19                            | 0.95-1.49        | 0.1285            |
| <b>Household Income</b>                        |                      |                  |               |                                 |                  |                   |
| Under \$25,000                                 | 2.99                 | 2.29-3.90        | <0.0001       | 3.95                            | 2.74-5.69        | <0.0001           |
| \$25-55,000                                    | 2.08                 | 1.62-2.66        | <0.0001       | 2.65                            | 1.90-3.70        | <0.0001           |
| \$55,000 and above                             | -                    | -                | -             | -                               | -                | -                 |
| <b>Insurance<sup>2</sup></b>                   |                      |                  |               |                                 |                  |                   |
| Government-sponsored                           | 0.24                 | 0.17-0.33        | <0.0001       | 0.22                            | 0.15-0.31        | <0.0001           |
| Private                                        | 0.22                 | 0.18-0.28        | <0.0001       | 0.15                            | 0.12-0.19        | <0.0001           |

<sup>1</sup> Models adjusted for age, sex, race, ethnicity, marital status, survey year, region, education, employment, paid sick leave status, household income, and insurance type.

<sup>2</sup> Government-sponsored insurance reference group is no government-sponsored insurance; Private insurance reference group is no private insurance.

**Supplemental Table 3: Health Care Affordability Issues in the Previous 12 Months for Cancer Survivors and Control Respondents**

| Model Outcome Variable <sup>1</sup>            | Unable to afford prescription medication |                  |                   | Unable to afford at least one of six services <sup>#</sup> |                  |                   |
|------------------------------------------------|------------------------------------------|------------------|-------------------|------------------------------------------------------------|------------------|-------------------|
|                                                | OR                                       | 95% CI           | P                 | OR                                                         | 95% CI           | P                 |
| <b>Cancer Survivors vs Control Respondents</b> | <b>1.77</b>                              | <b>1.46-2.14</b> | <b>&lt;0.0001</b> | <b>1.46</b>                                                | <b>1.27-1.68</b> | <b>&lt;0.0001</b> |
| <b>Age (years)</b>                             |                                          |                  |                   |                                                            |                  |                   |
| 18 to <40                                      | -                                        | -                | -                 | -                                                          | -                | -                 |
| 40 to <50                                      | 1.35                                     | 1.01-1.80        | 0.0408            | 1.10                                                       | 0.87-1.38        | 0.4387            |
| 50 to <65                                      | 0.93                                     | 0.71-1.21        | 0.5808            | 0.92                                                       | 0.76-1.13        | 0.4254            |
| 65 to <80                                      | 0.37                                     | 0.25-0.54        | <0.0001           | 0.33                                                       | 0.25-0.43        | <0.0001           |
| 80+                                            | 0.28                                     | 0.08-1.03        | 0.0544            | 0.16                                                       | 0.05-0.49        | 0.0015            |
| <b>Female sex</b>                              | 1.39                                     | 1.14-1.69        | 0.0013            | 1.34                                                       | 1.16-1.56        | <0.0001           |
| <b>Race</b>                                    |                                          |                  |                   |                                                            |                  |                   |
| White                                          | -                                        | -                | -                 | -                                                          | -                | -                 |
| Black                                          | 1.16                                     | 0.91-1.48        | 0.2191            | 0.98                                                       | 0.80-1.19        | 0.8066            |
| Other                                          | 0.91                                     | 0.64-1.29        | 0.5824            | 0.88                                                       | 0.67-1.15        | 0.3380            |
| <b>Hispanic ethnicity</b>                      | 1.02                                     | 0.74-1.48        | 0.9246            | 1.02                                                       | 0.81-1.28        | 0.8644            |
| <b>Not married</b>                             | 1.67                                     | 1.39-2.01        | <0.0001           | 1.74                                                       | 1.51-1.99        | <0.0001           |
| <b>Year of NHIS Survey</b>                     |                                          |                  |                   |                                                            |                  |                   |
| 2010                                           | -                                        | -                | -                 | -                                                          | -                | -                 |
| 2011                                           | 0.93                                     | 0.68-1.26        | 0.6315            | 1.08                                                       | 0.85-1.36        | 0.5333            |
| 2012                                           | 0.70                                     | 0.50-0.99        | 0.0419            | 0.95                                                       | 0.75-1.21        | 0.6984            |
| 2013                                           | 0.79                                     | 0.59-1.07        | 0.1212            | 0.96                                                       | 0.75-1.23        | 0.7375            |
| 2014                                           | 0.72                                     | 0.49-1.05        | 0.0907            | 0.83                                                       | 0.65-1.07        | 0.1551            |
| 2015                                           | 0.55                                     | 0.38-0.80        | 0.0017            | 0.78                                                       | 0.60-1.02        | 0.0654            |
| 2016                                           | 0.62                                     | 0.43-0.89        | 0.0104            | 0.83                                                       | 0.65-1.07        | 0.1594            |
| <b>Region</b>                                  |                                          |                  |                   |                                                            |                  |                   |
| South                                          | -                                        | -                | -                 | -                                                          | -                | -                 |
| Northeast                                      | 0.77                                     | 0.58-1.01        | 0.0575            | 0.77                                                       | 0.61-0.97        | 0.0277            |
| Midwest                                        | 0.82                                     | 0.66-1.02        | 0.0796            | 0.86                                                       | 0.72-1.02        | 0.0859            |
| West                                           | 0.73                                     | 0.57-0.95        | 0.0171            | 1.06                                                       | 0.88-1.28        | 0.5108            |
| <b>Education</b>                               |                                          |                  |                   |                                                            |                  |                   |
| Less than High School                          | 1.18                                     | 0.88-1.57        | 0.2762            | 1.14                                                       | 0.90-1.44        | 0.2666            |
| Graduated High School/GED                      | 1.20                                     | 0.97-1.50        | 0.0993            | 1.00                                                       | 0.84-1.19        | 0.9837            |
| More than High School                          | -                                        | -                | -                 | -                                                          | -                | -                 |
| <b>Not working for pay</b>                     | 1.28                                     | 1.04-1.59        | 0.02124           | 1.08                                                       | 0.92-1.27        | 0.3703            |
| <b>No paid sick leave</b>                      | 1.27                                     | 1.02-1.57        | 0.0293            | 1.25                                                       | 1.06-1.48        | 0.0074            |
| <b>Household Income</b>                        |                                          |                  |                   |                                                            |                  |                   |
| Under \$25,000                                 | 3.72                                     | 2.61-5.29        | <0.0001           | 4.03                                                       | 3.19-5.10        | <0.0001           |
| \$25-55,000                                    | 2.51                                     | 1.79-3.52        | <0.0001           | 2.37                                                       | 1.91-2.93        | <0.0001           |
| \$55,000 and above                             | -                                        | -                | -                 | -                                                          | -                | -                 |
| <b>Insurance<sup>2</sup></b>                   |                                          |                  |                   |                                                            |                  |                   |
| Government-sponsored                           | 0.37                                     | 0.28-0.49        | <0.0001           | 0.52                                                       | 0.41-0.66        | <0.0001           |
| Private                                        | 0.29                                     | 0.24-0.36        | <0.0001           | 0.33                                                       | 0.27-0.39        | <0.0001           |

<sup>1</sup> Models adjusted for age, sex, race, ethnicity, marital status, survey year, region, education, employment, paid sick leave status, household income, and insurance type.

<sup>2</sup> Government-sponsored insurance reference group is no government-sponsored insurance; Private insurance reference group is no private insurance.

# Unable to afford at least one of the following: medications, follow-up care, specialist care, mental health care, dental care, eyeglasses.

**Supplemental Table 4: Ability to Afford All Six Health Care Services in the Previous 12 Months for Cancer Survivors and Control Respondents**

| Model Outcome Variable <sup>1</sup>             | Able to afford all six services <sup>#</sup> |                  |                   |
|-------------------------------------------------|----------------------------------------------|------------------|-------------------|
|                                                 | OR                                           | 95% CI           | P                 |
| <b>Cancer Survivors vs Control Participants</b> | <b>0.68</b>                                  | <b>0.60-0.79</b> | <b>&lt;0.0001</b> |
| <b>Age (years)</b>                              |                                              |                  |                   |
| 18 to <40                                       | -                                            | -                | -                 |
| 40 to <50                                       | 0.91                                         | 0.73-1.15        | 0.4387            |
| 50 to <65                                       | 1.09                                         | 0.89-1.33        | 0.4254            |
| 65 to <80                                       | 3.06                                         | 2.36-3.97        | <0.0001           |
| 80+                                             | 6.40                                         | 2.04-20.09       | 0.0015            |
| <b>Female sex</b>                               | 0.74                                         | 0.64-0.86        | <0.0001           |
| <b>Race</b>                                     |                                              |                  |                   |
| White                                           | -                                            | -                | -                 |
| Black                                           | 1.03                                         | 0.84-1.25        | 0.8066            |
| Other                                           | 1.14                                         | 0.87-1.49        | 0.3380            |
| <b>Hispanic ethnicity</b>                       | 0.98                                         | 0.78-1.23        | 0.8644            |
| <b>Not married</b>                              | 0.58                                         | 0.50-0.66        | <0.0001           |
| <b>Survey year</b>                              |                                              |                  |                   |
| 2010                                            | -                                            | -                | -                 |
| 2011                                            | 0.93                                         | 0.74-1.17        | 0.5333            |
| 2012                                            | 1.05                                         | 0.83-1.33        | 0.6984            |
| 2013                                            | 1.04                                         | 0.82-1.33        | 0.7375            |
| 2014                                            | 1.20                                         | 0.93-1.55        | 0.1551            |
| 2015                                            | 1.28                                         | 0.98-1.68        | 0.0654            |
| 2016                                            | 1.20                                         | 0.93-1.55        | 0.1594            |
| <b>Region</b>                                   |                                              |                  |                   |
| South                                           | -                                            | -                | -                 |
| Northeast                                       | 1.30                                         | 1.03-1.63        | 0.0277            |
| Midwest                                         | 1.16                                         | 0.98-1.38        | 0.0859            |
| West                                            | 0.94                                         | 0.78-1.13        | 0.5108            |
| <b>Education</b>                                |                                              |                  |                   |
| Less than High School                           | 0.88                                         | 0.70-1.11        | 0.2666            |
| Graduated High School/GED                       | 1.00                                         | 0.84-1.19        | 0.9837            |
| More than High School                           | -                                            | -                | -                 |
| <b>Not working for pay</b>                      | 0.93                                         | 0.79-1.09        | 0.3703            |
| <b>No paid sick leave</b>                       | 0.80                                         | 0.68-0.94        | 0.0074            |
| <b>Household Income</b>                         |                                              |                  |                   |
| Under \$25,000                                  | 0.25                                         | 0.20-0.31        | <0.0001           |
| \$25-55,000                                     | 0.42                                         | 0.34-0.52        | <0.0001           |
| \$55,000 and above                              | -                                            | -                | -                 |
| <b>Insurance<sup>2</sup></b>                    |                                              |                  |                   |
| Government-sponsored                            | 1.94                                         | 1.53-2.46        | <0.0001           |
| Private                                         | 3.05                                         | 2.54-3.66        | <0.0001           |

<sup>1</sup> Model adjusted for age, sex, race, ethnicity, marital status, survey year, region, education, employment, paid sick leave status, household income, and insurance type.

<sup>2</sup> Government-sponsored insurance reference group is no government-sponsored insurance; Private insurance reference group is no private insurance

# Able to afford all of the following: medications, follow-up care, specialist care, mental health care, dental care, eyeglasses.



**Supplemental Table 5. Questions Related to Healthcare Access and Affordability from the National Health Interview Survey (NHIS)**

| Variables *                                          | description                                                                                                                                                                                                                             | Name                 | File              |
|------------------------------------------------------|-----------------------------------------------------------------------------------------------------------------------------------------------------------------------------------------------------------------------------------------|----------------------|-------------------|
| Medical care delayed previous 12 months              | DURING THE PAST 12 MONTHS, has medical care been delayed for [person] because of worry about the cost? (Do not include dental care)                                                                                                     | PDMED12M             | person file       |
| Need and not get medical care previous 12 months     | DURING THE PAST 12 MONTHS, was there any time when [person] needed medical care, but did not get it because [person] couldn't afford it?                                                                                                | PNMED12M             | person file       |
| No usual place to go when sick                       | Is there a place that you USUALLY go to when you are sick or need advice about your health?                                                                                                                                             | AUSUALPL             | sample adult file |
| No usual place for routine/preventive care           | What kind of place do you USUALLY go to when you need routine or preventive care, such as a physical examination or check-up?                                                                                                           | AHCPLKND             | sample adult file |
| Unable to pay medical bills                          | In the past 12 months did [fill1: you/anyone in the family] have problems paying or were unable to pay any medical bills? Include bills for doctors, dentists, hospitals, therapists, medication, equipment, nursing home or home care. | MEDBILL              | person file       |
| Not able to afford the previous 12 months:           |                                                                                                                                                                                                                                         |                      |                   |
| prescription medication                              | DURING THE PAST 12 MONTHS, was there any time when you needed any of the following, but didn't get it because you couldn't afford it? ..... Prescription medicines                                                                      | AHCAFYR1 or AHCAFY_1 | sample adult file |
| follow-up care                                       | DURING THE PAST 12 MONTHS, was there any time when you needed any of the following, but didn't get it because you couldn't afford it...Follow-up care.                                                                                  | AHCAFYR6             | sample adult file |
| specialist care                                      | DURING THE PAST 12 MONTHS, was there any time when you needed any of the following, but didn't get it because you couldn't afford it?...To see a specialist                                                                             | AHCAFYR5             | sample adult file |
| mental health care                                   | DURING THE PAST 12 MONTHS, was there any time when you needed any of the following, but didn't get it because you couldn't afford it? ..... Mental health care or counseling                                                            | AHCAFYR2             | sample adult file |
| dental care                                          | DURING THE PAST 12 MONTHS, was there any time when you needed any of the following, but didn't get it because you couldn't afford it? ..... Dental care (including check-ups)                                                           | AHCAFYR3             | sample adult file |
| eyeglasses                                           | DURING THE PAST 12 MONTHS, was there any time when you needed any of the following, but didn't get it because you couldn't afford it? ..... Eyeglasses                                                                                  | AHCAFYR4             | sample adult file |
| Worried paying medical bills if sick/had an accident | If you get sick or have an accident, how worried are you that you will be able to pay your medical bills? Are you very worried, somewhat worried, or not at all worried?                                                                | AWORPAY              | sample adult file |
| Skipped medication doses to save money               | DURING THE PAST 12 MONTHS, were any of the following true for you?...You skipped medication doses to save money                                                                                                                         | ARX12_1              | sample adult file |
| Took less medication to save money                   | DURING THE PAST 12 MONTHS, were any of the following true for you?...you took less medicine to save money                                                                                                                               | ARX12_2              | sample adult file |
| Delayed filling prescription to save money           | DURING THE PAST 12 MONTHS, were any of the following true for you?...You delayed filling a prescription to save money                                                                                                                   | ARX12_3              | sample adult file |
| Asked doctor for lower cost medicine                 | DURING THE PAST 12 MONTHS, were any of the following true for you?...You asked your doctor for a lower cost medication to save money.                                                                                                   | ARX12_4              | sample adult file |
| Used alternative therapies to save money             | DURING THE PAST 12 MONTHS, were any of the following true for you?...You used alternative therapies to save money.                                                                                                                      | ARX12_6              | sample adult file |

\* NHIS data from 2010 to 2016 obtained from website of the National Center for Health Statistics (<https://www.cdc.gov/nchs/nhis/data-questionnaires-documentation.htm>)
